# Supplementary material for: The Kaposi’s Sarcoma-Associated Herpesvirus Protein ORF42 Is Required for Efficient Virion Production and Expression of Viral Proteins
Source: PubMed Central journal article supplement (PMC6722526; doi:10.3390/v11080711), 2019-08-02
Supplement: viruses-11-00711-s001.pdf [file viruses-11-00711-s001.pdf]

```

1      atgtccctggaaagggccctggcgagactgactggagtgccaatgagtactcatgccccgaagactcgcg 70
71     agtcagaagaggcctgtcccgtataccccaccctgtgggtgccccgccttgtcctggaagtgcataaggaa 140
141    aaacaacgcactgggttgaagcaatacccccaaaaatgtccgtgatgggccacttagatatagcgtgtctc 210
211    agggagcacgtgaaatctcgctgtcctcgcccactttgtgggatttacgggtgggtgtgcctggtgagc 280
281    acgaagacatgggtgaccacatagacctacaccctcacgtgttccaagagcgagtggtgcctccttagacc 350
351    tacatctcccggcataaccgagctctgctgcctgttatcgatgctcgagaactgtcgagacatgtcacca 420
421    acgtttttgagatctattatgtcgcgcccagaaagacacatgagaggacgcccgggatggacgcgccct 490
491    tcgtcatgcacggtatagagacgttgactgccacggccgccttgtttacgagctgtccgtggacgatca 560
561    tttcagggccaccctcgttatgtttaagcttcataaggcgataggcgacgcttcaacccccatgggg 630
631    ggactaatgaaaccatttatctagagtcttttaaactggagtctagtggagagaatgaagatgacaaac 700
701    aaacctgcgcgaccagtaaacattttttattgtgataccatctttaccaagcacctggagaacaatga 770
771    agttttaaaatatctgaaaatgtgcacccttttcaaacccccattgtttccctttttcaaaatcaggg 840
841    cggccgctcgagggaggcgggtggagccgactacaaggaccacgacggcgactacaaggaccacgacatcg 910
911    actacaaggacgacgacgacaaggggcccgtttaaatgacaaacaaacctgocgcgaccagtaaacatt 980
981    ttttattgtgataccatctttaccaagcacctggagaacaatgaagttttaaaatatctgaaaatgtgca 1050
1051 cccttttcaaacccccattgtttcccttttttcaaaattaaagataaaagcctgggtccaggcctctagct 1120
1121 gtagagtcattttcctttgctgtcttgggggttgtgttcctgtgggctaacttgccggacagctttcagagt 1190
1191 ctgctctaaatagaacaggttaattaacatccacaggaagcgaaaagcctgcccggtaacacatgggtccg 1260
1261 gactttgttactataaacagccttggtgcttaggcagtcaaatggtaaaggggggcatactgggatccctt 1330
1331 cacagtgcgataggggatgagccagaatgatgtttgtcttcgcctatgaaaatacaggggtatcacttc 1400
1401 ctctatcagctgcagccaggaagtgtcgggagggcatgtttagggctcgttcaatgcatgtgtggttaagctt 1470
1471 tgcagccaggtaaacaaagccgcagaggttgggggagtttctgtgttccccatttccctcagtgctctggtc 1540
1541 cggtgatgtgacgtgggttaggctcaccctccctccctcgtgctcgaccttgactgcctgcatggaggaa 1610
1611 atatcccatcgaggttgaaaagagcaagttcgcgatgcatgagaatacaagatccccgaagtcccccc 1680
1681 ttcagagtaaacccggccat 1700

```

|                              |                                                          |
|------------------------------|----------------------------------------------------------|
| Light blue                   | ORF42 coding sequence (including mutation in stop codon) |
| Orange                       | Flag tag                                                 |
| Green                        | ORF41 coding sequence (on opposite strand)               |
| <u>Underline and italics</u> | stop codon and polyadenylation signals for ORF42         |
| <b>Bold</b>                  | duplicated sequences (end of OR42 and 3' region)         |
| <u><b>Bold</b></u>           | polydenylation signal for ORF41 (in duplicated region)   |
